# Supplementary material for: Improved Fixation Stability of a Dedicated Rib Fixation System in Flail Chest: A Retrospective Study
Source: MDPI journal article supplement (doi:10.3390/medicina58030345), 2022-02-24
Supplement: s1 [file s1]

## Supplementary materials

### Improved Fixation Stability of a Dedicated Rib Fixation System in Flail Chest: A Retrospective Study

Shang-Ting Tsai <sup>1</sup>, Hung-Yu Lin <sup>2</sup>, Chia-Ying Li <sup>3,4,\*</sup> and Chih-Chien Lin <sup>1,\*</sup>

<sup>1</sup> Department of Emergency Medicine, Show Chwan Memorial Hospital, Changhua 500, Taiwan; tim502323@gmail.com (S.-T.T.)

<sup>2</sup> Research Assistant Center, Show Chwan Memorial Hospital, Changhua 500, Taiwan; linhungyu700218@gmail.com (H.-Y.L.)

<sup>3</sup> Department of Surgery, Show Chwan Memorial Hospital, Changhua 500, Taiwan

<sup>4</sup> Graduate Institute of Biomedical Engineering, National Chung Hsing University, Taichung 402, Taiwan

\* Correspondence: b86401115@ntu.edu.tw (C.-Y.L.); bkforever@gmail.com (C.-C.L.)

**Table S1.** Demographic and Injury Data

| Variable                    | Mini ( <i>n</i> = 20) | APS ( <i>n</i> = 13) | Mini + APS ( <i>n</i> = 10) | <i>p</i> value |
|-----------------------------|-----------------------|----------------------|-----------------------------|----------------|
| Age (yr)                    | 56.3 ± 17.2 (18-77)   | 62.6 ± 14.13 (38-89) | 52.4 ± 23.9 (18-83)         | 0.39           |
| Sex (male)                  | 10 (50.0%)            | 7 (53.8%)            | 7 (70%)                     | 0.57           |
| Mechanism                   |                       |                      |                             |                |
| Motor vehicle collision     | 11 (55.0%)            | 10 (76.9%)           | 8 (80%)                     | 0.26           |
| Fall                        | 9 (45.0%)             | 3 (23.1%)            | 2 (20%)                     | 0.26           |
| Other injury                |                       |                      |                             |                |
| Clavicle fracture           | 3 (15.0%)             | 3 (23.1%)            | 3 (30%)                     | 0.61           |
| Scapula fracture            | 2 (10.0%)             | 3 (23.1%)            | 0 (0.0%)                    | 0.22           |
| Sternum fracture            | 2 (10.0%)             | 0 (0.0%)             | 0 (0.0%)                    | 0.29           |
| Number of rib fractures     | 4.3 ± 2.9             | 3.8 ± 2.4            | 5.7 ± 2.6                   | 0.26           |
| Bilateral rib fractures     | 0 (0.0%)              | 1 (7.7%)             | 2 (20.0%)                   | 0.12           |
| Pneumothorax                | 8 (40.0%)             | 7 (53.8%)            | 7 (70.0%)                   | 0.29           |
| Hospital length of stay (d) | 10.7 ± 7.0 (4-34)     | 19.6 ± 16.6 (5-59)   | 12.0 ± 7.6 (3-30)           | 0.31           |

**Table S2.** Post-surgical complications

| Patient code | Treatment | Complications                            |
|--------------|-----------|------------------------------------------|
| R-1-1        | APS       | nil                                      |
| R-1-2        | APS       | nil                                      |
| R-1-3        | APS       | nil                                      |
| MR-1-4       | Mini+APS  | nil                                      |
| R-1-5        | Mini+APS  | nil                                      |
| R-1-6        | Mini+APS  | nil                                      |
| R-1-7        | Mini+APS  | nil                                      |
| R-1-8        | Mini+APS  | nil                                      |
| R-1-9        | Mini+APS  | nil                                      |
| R-1-10       | Mini+APS  | nil                                      |
| R-1-11       | APS       | nil                                      |
| R-1-12       | Mini+APS  | nil                                      |
| R-1-13       | APS       | nil                                      |
| R-1-14       | APS       | ADM due to HEMATURIA                     |
| R-1-15       | APS       | nil                                      |
| R-1-16       | Mini+APS  | nil                                      |
| R-1-17       | APS       | nil                                      |
| R-1-18       | APS       | ADM due to CONSCIOUS CHANGE              |
| R-1-19       | APS       | nil                                      |
| R-1-20       | Mini+APS  | nil                                      |
| R-1-21       | APS       | nil                                      |
| R-1-22       | APS       | nil                                      |
| R-1-23       | APS       | nil                                      |
| M-1-1        | MINI      | nil                                      |
| M-1-2        | MINI      | nil                                      |
| M-1-3        | MINI      | nil                                      |
| M-1-4        | MINI      | nil                                      |
| M-1-5        | MINI      | nil                                      |
| M-1-6        | MINI      | nil                                      |
| M-1-7        | MINI      | nil                                      |
| M-1-8        | MINI      | nil                                      |
| M-1-9        | MINI      | nil                                      |
| M-1-11       | MINI      | nil                                      |
| M-1-12       | MINI      | ADM due to seroma. Receiving debridement |
| M-1-13       | MINI      | nil                                      |
| M-1-14       | MINI      | nil                                      |

|        |      |     |
|--------|------|-----|
| M-1-15 | MINI | nil |
| M-1-16 | MINI | nil |
| M-1-17 | MINI | nil |
| M-1-18 | MINI | nil |
| M-1-19 | MINI | nil |
| M-1-22 | MINI | nil |
| M-1-23 | MINI | nil |

---
